# Supplementary material for: Uncertainty in simulated brightness temperature due to sensitivity to atmospheric gas spectroscopic parameters from the centimeter- to submillimeter-wave range
Source: Copernicus journal article supplement (doi:10.5194/acp-24-7283-2024), 2024-06-26
Supplement: Supplementary file 1 [file acp-24-7283-2024-supplement.zip]

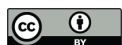

## *Supplement of*

# **Uncertainty in simulated brightness temperature due to sensitivity to atmospheric gas spectroscopic parameters from the centimeter- to submillimeter-wave range**

**Donatello Gallucci et al.**

*Correspondence to:* Donatello Gallucci ([donatello.gallucci@cnr.it](mailto:donatello.gallucci@cnr.it)) and Domenico Cimini ([domenico.cimini@cnr.it](mailto:domenico.cimini@cnr.it))

- [acp-24-7283-2024-supplement-title-page.pdf](#)
- [Cov\\_Cor\\_parameters\\_Gallucci\\_et\\_al\\_ACP\\_2024\\_V1.0.nc](#)
- [Cov\\_Tb\\_ATMS\\_Gallucci\\_et\\_al\\_ACP\\_2024\\_V1.0.nc](#)
- [Cov\\_Tb\\_ICI\\_Gallucci\\_et\\_al\\_ACP\\_2024\\_V1.0.nc](#)
- [Cov\\_Tb\\_MWI\\_Gallucci\\_et\\_al\\_ACP\\_2024\\_V1.0.nc](#)
- [Cov\\_Tb\\_MWS\\_Gallucci\\_et\\_al\\_ACP\\_2024\\_V1.0.nc](#)

The copyright of individual parts of the supplement might differ from the article licence.
